# Supplementary material
Source: HighWire-hosted journal article supplement (https://tobaccocontrol.bmj.com/content/29/2/168)
Supplement: inline-supplementary-material-1 [file inline-supplementary-material-1.pdf]

S1: The Number of Tobacco Retailers in Scotland, by local authority (2012-2017)

| Local Authority       | 2012   | 2013   | 2014  | 2015  | 2016  | 2017  |
|-----------------------|--------|--------|-------|-------|-------|-------|
| Aberdeen City         | 405    | 417    | 331   | 318   | 331   | 350   |
| Aberdeenshire         | 425    | 422    | 336   | 310   | 298   | 291   |
| Angus                 | 215    | 216    | 173   | 165   | 174   | 174   |
| Argyll and Bute       | 269    | 272    | 263   | 227   | 240   | 235   |
| City of Edinburgh     | 986    | 997    | 885   | 906   | 927   | 921   |
| Clackmannanshire      | 84     | 85     | 89    | 84    | 81    | 80    |
| Dumfries and Galloway | 431    | 426    | 345   | 339   | 328   | 325   |
| Dundee City           | 307    | 312    | 271   | 269   | 265   | 257   |
| East Ayrshire         | 230    | 232    | 206   | 203   | 212   | 216   |
| East Dunbartonshire   | 109    | 111    | 104   | 103   | 108   | 111   |
| East Lothian          | 163    | 167    | 149   | 141   | 144   | 140   |
| East Renfrewshire     | 101    | 101    | 98    | 94    | 104   | 107   |
| Eilean Siar           | 60     | 59     | 63    | 59    | 66    | 67    |
| Falkirk               | 278    | 280    | 252   | 259   | 274   | 275   |
| Fife                  | 646    | 646    | 556   | 559   | 573   | 591   |
| Glasgow City          | 1213   | 1214   | 1139  | 1124  | 1160  | 1177  |
| Highland              | 602    | 596    | 469   | 470   | 508   | 499   |
| Inverclyde            | 146    | 147    | 131   | 128   | 128   | 127   |
| Midlothian            | 137    | 137    | 121   | 120   | 131   | 135   |
| Moray                 | 203    | 201    | 137   | 138   | 139   | 140   |
| North Ayrshire        | 233    | 230    | 213   | 216   | 226   | 223   |
| North Lanarkshire     | 569    | 577    | 531   | 533   | 553   | 572   |
| Orkney Islands        | 65     | 65     | 67    | 69    | 67    | 66    |
| Perth and Kinross     | 300    | 297    | 260   | 251   | 233   | 232   |
| Renfrewshire          | 292    | 302    | 285   | 261   | 269   | 279   |
| Scottish Borders      | 203    | 203    | 169   | 171   | 174   | 171   |
| Shetland Islands      | 89     | 89     | 88    | 85    | 81    | 81    |
| South Ayrshire        | 247    | 250    | 219   | 201   | 187   | 187   |
| South Lanarkshire     | 500    | 502    | 460   | 461   | 467   | 489   |
| Stirling              | 197    | 198    | 183   | 176   | 178   | 171   |
| West Dunbartonshire   | 165    | 164    | 150   | 136   | 144   | 152   |
| West Lothian          | 290    | 290    | 267   | 271   | 272   | 277   |
| Scotland              | 10,161 | 10,206 | 9,010 | 8,847 | 9,042 | 9,118 |

S2: Number of Tobacco Retailers per 10,000 people in Scotland, by local authority (2012-2017)

| <b>Local Authority</b> | <b>2012</b> | <b>2013</b> | <b>2014</b> | <b>2015</b> | <b>2016</b> | <b>2017</b> |
|------------------------|-------------|-------------|-------------|-------------|-------------|-------------|
| Aberdeen City          | 18.01       | 18.36       | 14.46       | 13.81       | 14.40       | 15.30       |
| Aberdeenshire          | 16.63       | 16.37       | 12.90       | 11.83       | 11.37       | 11.12       |
| Angus                  | 18.50       | 18.57       | 14.82       | 14.11       | 14.93       | 14.96       |
| Argyll and Bute        | 30.95       | 30.89       | 30.01       | 26.12       | 27.55       | 27.07       |
| City of Edinburgh      | 20.43       | 20.45       | 17.97       | 18.16       | 18.28       | 17.95       |
| Clackmannanshire       | 16.38       | 16.58       | 17.39       | 16.36       | 15.77       | 15.55       |
| Dumfries and Galloway  | 28.57       | 28.35       | 23.01       | 22.65       | 21.94       | 21.78       |
| Dundee City            | 20.77       | 21.07       | 18.29       | 18.15       | 17.87       | 17.28       |
| East Ayrshire          | 18.74       | 18.95       | 16.87       | 16.63       | 17.35       | 17.71       |
| East Dunbartonshire    | 10.29       | 10.49       | 9.75        | 9.63        | 10.04       | 10.27       |
| East Lothian           | 16.16       | 16.47       | 14.59       | 13.68       | 13.83       | 13.35       |
| East Renfrewshire      | 11.09       | 11.03       | 10.60       | 10.11       | 11.09       | 11.29       |
| Eilean Siar            | 3.83        | 3.75        | 4.00        | 3.72        | 4.14        | 4.18        |
| Falkirk                | 7.59        | 7.63        | 6.86        | 7.04        | 7.40        | 7.40        |
| Fife                   | 10.86       | 10.83       | 9.27        | 9.22        | 9.32        | 9.52        |
| Glasgow City           | 52.08       | 52.12       | 48.87       | 48.01       | 49.41       | 50.05       |
| Highland               | 74.61       | 74.18       | 58.71       | 59.12       | 64.17       | 63.36       |
| Inverclyde             | 17.33       | 17.35       | 15.19       | 14.65       | 14.45       | 14.10       |
| Midlothian             | 14.74       | 14.52       | 12.77       | 12.56       | 13.64       | 14.09       |
| Moray                  | 73.66       | 73.36       | 50.28       | 50.98       | 51.67       | 51.95       |
| North Ayrshire         | 16.94       | 16.80       | 15.61       | 15.87       | 16.63       | 16.42       |
| North Lanarkshire      | 16.84       | 17.08       | 15.71       | 15.76       | 16.29       | 16.83       |
| Orkney Islands         | 30.19       | 30.15       | 31.05       | 31.84       | 30.66       | 30          |
| Perth and Kinross      | 20.31       | 20.10       | 17.46       | 16.74       | 15.46       | 15.35       |
| Renfrewshire           | 16.75       | 17.37       | 16.36       | 14.95       | 15.29       | 15.78       |
| Scottish Borders       | 17.85       | 17.83       | 14.82       | 15.00       | 15.19       | 14.87       |
| Shetland Islands       | 38.35       | 38.36       | 37.90       | 36.64       | 34.91       | 35.10       |
| South Ayrshire         | 21.87       | 22.15       | 19.46       | 17.88       | 16.63       | 16.60       |
| South Lanarkshire      | 15.91       | 15.95       | 14.59       | 14.58       | 14.73       | 15.37       |
| Stirling               | 21.65       | 21.70       | 20.00       | 18.96       | 18.99       | 18.19       |
| West Dunbartonshire    | 18.26       | 18.26       | 16.72       | 15.18       | 16.02       | 16.96       |
| West Lothian           | 16.48       | 16.46       | 15.07       | 15.18       | 15.10       | 15.28       |
| Scotland               | 19.12       | 19.16       | 16.85       | 16.47       | 16.73       | 16.81       |
